# Supplementary material
Source: Springer Nature journal article supplement (https://www.springermedizin.de/resource/supplementary/12990_2010_367_MOESM2_ESM.pdf/9613116)

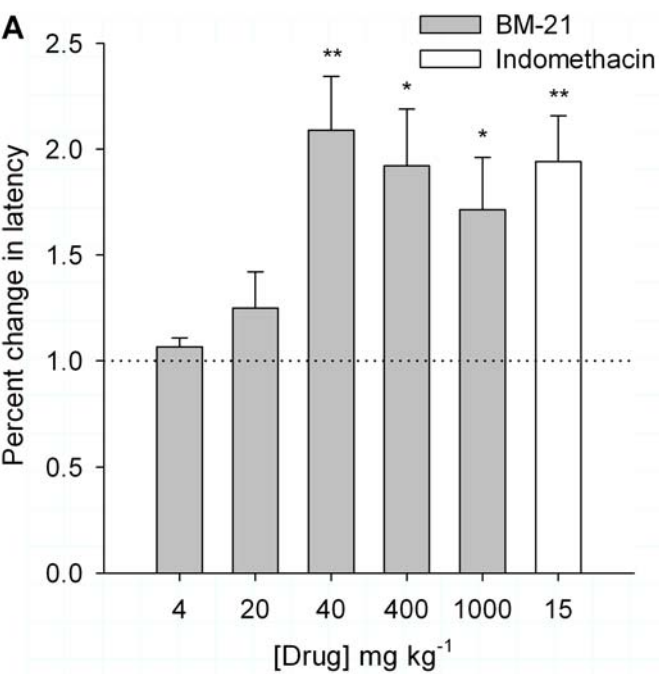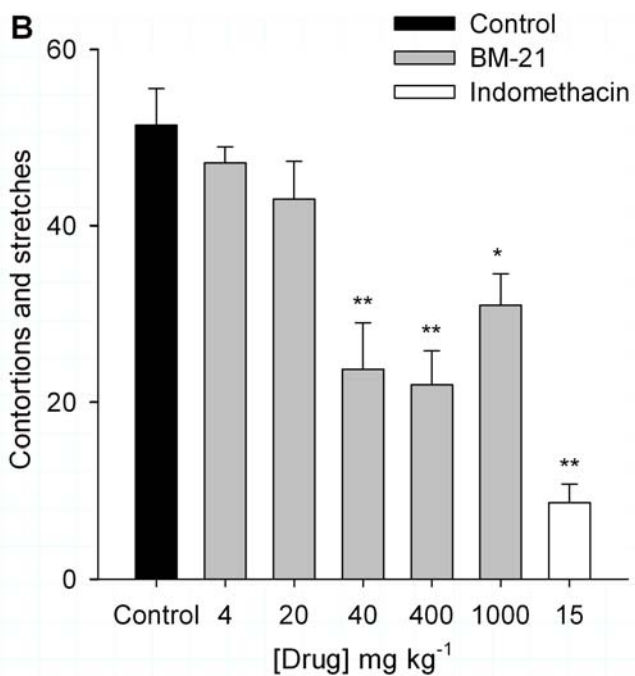

Supplement: MOESM2 [file 9613116]
